# Supplementary material
Source: MDPI journal article supplement (https://www.mdpi.com/2071-1050/14/1/422)
Supplement: s1 [file s1]

## Supplementary material

### **Development of green methods for the determination of elemental impurities in commercial pharmaceutical tablets**

Vitoria H. Cauduro<sup>a</sup>, Alessandra S. Henn<sup>a</sup>, Rochele S. Picoloto<sup>a</sup>, Edson I. Müller<sup>a</sup>,

Marcia F. Mesko<sup>b</sup>, Erico M. M. Flores<sup>a\*</sup>

*<sup>a</sup>Departamento de Química, Universidade Federal de Santa Maria, 97105-900, Santa Maria, RS, Brazil*

*<sup>b</sup>Centro de Ciências Químicas, Farmacêuticas e de Alimentos, Universidade Federal de Pelotas, 96160-000, Capão do Leão, RS, Brazil*

### **Contents**

#### **Figure S-1**

Molecular structure of the APIs contained in the oral drugs used in this study: A) canagliflozin, B) glibenclamide, C) metformin hydrochlorate, D) pioglitazone hydrochloride, E) repaglinide, and F) sitagliptin phosphate.

#### **Table S-1**

Analyte recovery after oral drug samples digestion by MAWD and MAWD-UV using optimized conditions (values in percentage, mean  $\pm$  standard deviation, n = 3).

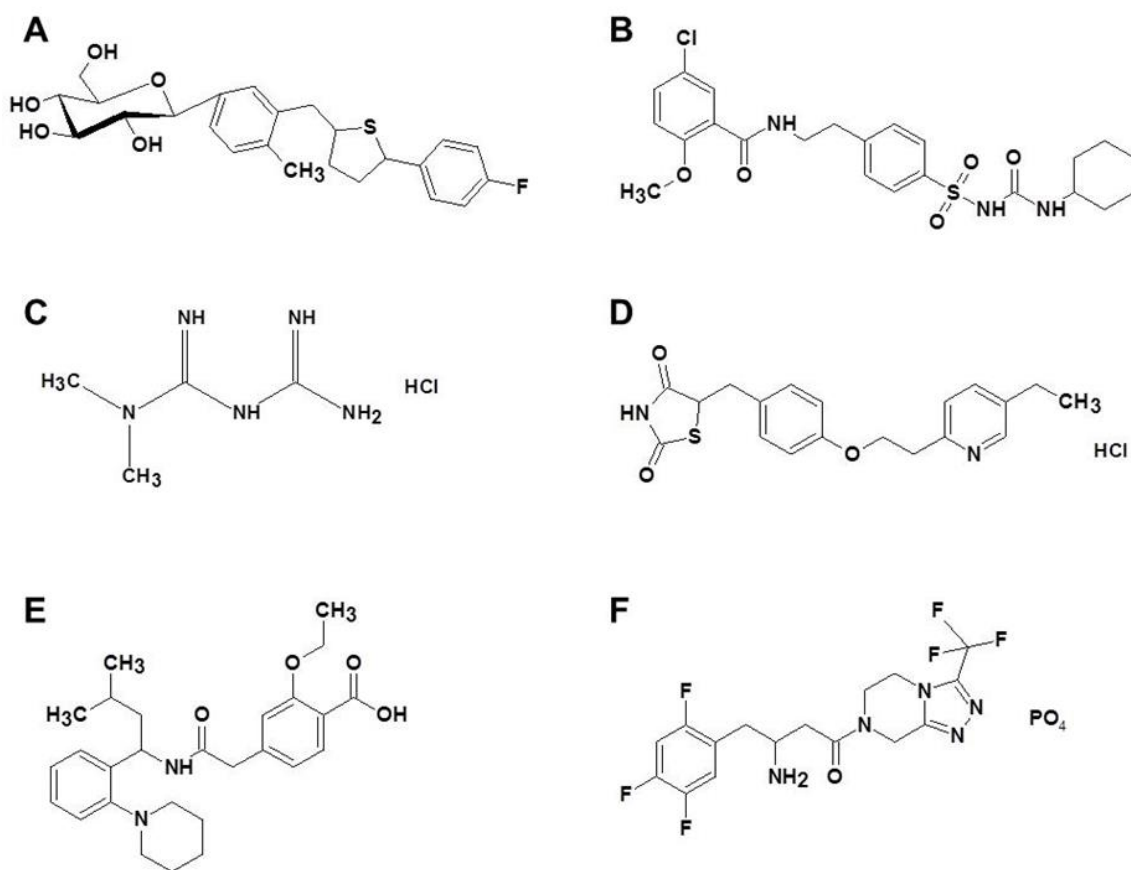

**Figure S1.** Molecular structure of the APIs contained in the oral drugs used in this study: A) canagliflozin, B) glibenclamide, C) metformin hydrochlorate, D) pioglitazone hydrochloride, E) repaglinide, F) sitagliptin phosphate.

**Table S1.** Analyte recovery after oral drug sample digestion by MAWD and MAWD-UV using optimized conditions (values in percentage, mean  $\pm$  standard deviation, n = 3).

| Sample                | Analyte        |                |                |                |                |                |                |
|-----------------------|----------------|----------------|----------------|----------------|----------------|----------------|----------------|
|                       | As             | Cd             | Co             | Hg             | Ni             | Pb             | V              |
| <b><u>MAWD</u></b>    |                |                |                |                |                |                |                |
| CANA <sup>b</sup>     | 108 $\pm$ 3    | 101 $\pm$ 2    | 103 $\pm$ 2    | 93.9 $\pm$ 2.2 | 103 $\pm$ 2    | 94.2 $\pm$ 3.8 | 92.8 $\pm$ 1.6 |
| GLIB <sup>a</sup>     | 95.9 $\pm$ 2.1 | 99.4 $\pm$ 1.1 | 96.8 $\pm$ 1.9 | 101 $\pm$ 3    | 105 $\pm$ 1    | 101 $\pm$ 3    | 98.5 $\pm$ 1.8 |
| MET <sup>a</sup>      | 108 $\pm$ 5    | 103 $\pm$ 2    | 101 $\pm$ 1    | 97.9 $\pm$ 3.4 | 100 $\pm$ 1    | 105 $\pm$ 5    | 104 $\pm$ 1    |
| SITA <sup>a</sup>     | 93.7 $\pm$ 3.6 | 90.2 $\pm$ 1.2 | 97.9 $\pm$ 0.9 | 96.6 $\pm$ 1.3 | 99.9 $\pm$ 0.7 | 90.5 $\pm$ 0.7 | 102 $\pm$ 3    |
| PIO <sup>a</sup>      | 98.8 $\pm$ 2.7 | 94.9 $\pm$ 2.5 | 100 $\pm$ 1    | 109 $\pm$ 1    | 102 $\pm$ 2    | 93.2 $\pm$ 0.3 | 95.9 $\pm$ 0.6 |
| REPA <sup>a</sup>     | 97.5 $\pm$ 0.7 | 90.1 $\pm$ 1.9 | 95.5 $\pm$ 4.2 | 102 $\pm$ 2    | 98.9 $\pm$ 1.0 | 97.0 $\pm$ 2.9 | 95.4 $\pm$ 1.9 |
| <b><u>MAWD-UV</u></b> |                |                |                |                |                |                |                |
| CANA                  | 103 $\pm$ 1    | 101 $\pm$ 2    | 100 $\pm$ 2    | 96.7 $\pm$ 2.8 | 97.8 $\pm$ 3.2 | 98.3 $\pm$ 2.4 | 100 $\pm$ 3    |
| GLIB                  | 110 $\pm$ 1    | 97.6 $\pm$ 1.0 | 95.8 $\pm$ 1.2 | 107 $\pm$ 3    | 106 $\pm$ 4    | 94.7 $\pm$ 2.0 | 105 $\pm$ 1    |
| MET                   | 103 $\pm$ 3    | 106 $\pm$ 3    | 105 $\pm$ 3    | 95.5 $\pm$ 1.6 | 105 $\pm$ 3    | 98.3 $\pm$ 3   | 96.3 $\pm$ 3.3 |
| PIO                   | 106 $\pm$ 4    | 100 $\pm$ 2    | 97.8 $\pm$ 1.8 | 97.6 $\pm$ 2.9 | 99.4 $\pm$ 1.2 | 104 $\pm$ 3    | 105 $\pm$ 2    |
| REPA                  | 106 $\pm$ 3    | 96.9 $\pm$ 2.0 | 94.0 $\pm$ 3.8 | 92.5 $\pm$ 2.6 | 92.5 $\pm$ 3.1 | 98.2 $\pm$ 1.7 | 97.8 $\pm$ 3.1 |
| SITA                  | 107 $\pm$ 1    | 96.6 $\pm$ 2.8 | 104 $\pm$ 2    | 98.0 $\pm$ 1.8 | 101 $\pm$ 3    | 106 $\pm$ 2    | 99.9 $\pm$ 1.3 |

a: MAWD: 500 mg of sample, 2 mol L<sup>-1</sup> HNO<sub>3</sub>, 1 mL of 50% H<sub>2</sub>O<sub>2</sub> and irradiation program 1.

b: MAWD: 500 mg of sample, 3 mol L<sup>-1</sup> HNO<sub>3</sub>, 1 mL of 50% H<sub>2</sub>O<sub>2</sub> and irradiation program 2.
